# Supplementary material for: Association between PCV13 pneumococcal vaccination and risk of hospital admissions due to pneumonia or sepsis among patients with haematological malignancies: a single-centre retrospective cohort study in Israel
Source: PubMed Central journal article supplement — BMJ Open. 2022 Apr 15;12(4):e056986. doi: 10.1136/bmjopen-2021-056986 (PMC9013985; doi:10.1136/bmjopen-2021-056986), 2022-04-15
Supplement: bmjopen-2021-056986.draft_revisions.pdf [file bmjopen-2021-056986.draft_revisions.pdf]

# BMJ Open

BMJ Open is committed to open peer review. As part of this commitment we make the peer review history of every article we publish publicly available.

When an article is published we post the peer reviewers' comments and the authors' responses online. We also post the versions of the paper that were used during peer review. These are the versions that the peer review comments apply to.

The versions of the paper that follow are the versions that were submitted during the peer review process. They are not the versions of record or the final published versions. They should not be cited or distributed as the published version of this manuscript.

BMJ Open is an open access journal and the full, final, typeset and author-corrected version of record of the manuscript is available on our site with no access controls, subscription charges or pay-per-view fees (<http://bmjopen.bmj.com>).

If you have any questions on BMJ Open's open peer review process please email [info.bmjopen@bmj.com](mailto:info.bmjopen@bmj.com)

# BMJ Open

## The Association Between PCV13 Vaccination and Hospital Admissions Due to Pneumonia or Sepsis: A cohort study in Patients with Hematological malignancies

|                               |                                                                                                                                                                                                                                                                                                                         |
|-------------------------------|-------------------------------------------------------------------------------------------------------------------------------------------------------------------------------------------------------------------------------------------------------------------------------------------------------------------------|
| Journal:                      | <i>BMJ Open</i>                                                                                                                                                                                                                                                                                                         |
| Manuscript ID                 | bmjopen-2021-056986                                                                                                                                                                                                                                                                                                     |
| Article Type:                 | Original research                                                                                                                                                                                                                                                                                                       |
| Date Submitted by the Author: | 03-Sep-2021                                                                                                                                                                                                                                                                                                             |
| Complete List of Authors:     | Draliuk, Regina; University of Haifa, Department of Nursing; Lady Davis Carmel Medical Center<br>Shadmi, Efrat ; University of Haifa Faculty of Social Welfare and Health Sciences<br>Preis, Meir ; Lady Davis Carmel Medical Center<br>Dagan, Efrat; University of Haifa Faculty of Social Welfare and Health Sciences |
| Keywords:                     | HAEMATOLOGY, Lymphoma < HAEMATOLOGY, Myeloma < HAEMATOLOGY                                                                                                                                                                                                                                                              |
|                               |                                                                                                                                                                                                                                                                                                                         |

SCHOLARONE™  
Manuscripts

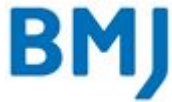

I, the Submitting Author has the right to grant and does grant on behalf of all authors of the Work (as defined in the below author licence), an exclusive licence and/or a non-exclusive licence for contributions from authors who are: i) UK Crown employees; ii) where BMJ has agreed a CC-BY licence shall apply, and/or iii) in accordance with the terms applicable for US Federal Government officers or employees acting as part of their official duties; on a worldwide, perpetual, irrevocable, royalty-free basis to BMJ Publishing Group Ltd ("BMJ") its licensees and where the relevant Journal is co-owned by BMJ to the co-owners of the Journal, to publish the Work in this journal and any other BMJ products and to exploit all rights, as set out in our [licence](#).

The Submitting Author accepts and understands that any supply made under these terms is made by BMJ to the Submitting Author unless you are acting as an employee on behalf of your employer or a postgraduate student of an affiliated institution which is paying any applicable article publishing charge ("APC") for Open Access articles. Where the Submitting Author wishes to make the Work available on an Open Access basis (and intends to pay the relevant APC), the terms of reuse of such Open Access shall be governed by a Creative Commons licence – details of these licences and which [Creative Commons](#) licence will apply to this Work are set out in our licence referred to above.

Other than as permitted in any relevant BMJ Author's Self Archiving Policies, I confirm this Work has not been accepted for publication elsewhere, is not being considered for publication elsewhere and does not duplicate material already published. I confirm all authors consent to publication of this Work and authorise the granting of this licence.

1  
2  
3  
4  
5  
6  
7  
8  
9  
10  
11  
12  
13  
14  
15  
16  
17  
18  
19  
20  
21  
22  
23  
24  
25  
26  
27  
28  
29  
30  
31  
32  
33  
34  
35  
36  
37  
38  
39  
40  
41  
42  
43  
44  
45  
46  
47  
48  
49  
50  
51  
52  
53  
54  
55  
56  
57  
58  
59  
60

# The Association Between PCV13 Vaccination and Hospital Admissions Due to Pneumonia or Sepsis: A cohort study in Patients with Hematological malignancies

Regina Draliuk<sup>1,2</sup>, Efrat Shadmi<sup>1</sup>, Meir Preis<sup>2,3</sup>, Efrat Dagan<sup>1</sup>

1. Department of Nursing, University of Haifa
2. Institute of Hematology, Lady Davis Carmel Medical Center
3. Bruce and Ruth Rappaport Faculty of Medicine, Technion, Haifa, Israel

## **Corresponding author:**

Draliuk Regina, MA, RN

Head Nurse, Institute of Hematology

Carmel Medical Center, 7 Michal St, Haifa, Israel

Email: [reginada2@clalit.org.il](mailto:reginada2@clalit.org.il)

Phone: +972-4-8250445

Fax: +972-4-8250701

**Key Words:** Hematological malignancies, PCV13, Hospital admissions

**Word Count:** 2172

## **Abstract**

**Background:** Patients with hematological malignancies receiving immunosuppressive therapy are at highest risk for invasive pneumococcal disease. Our goal was to investigate whether vaccinating hematological patients with pneumococcal 13-valent conjugated vaccine (PCV13) prior to therapy initiation is associated with decreased hospital admissions due to pneumonia or sepsis within 12 months.

**Methods:** A longitudinal retrospective cohort study was conducted at the Hematology Unit, Carmel Medical Center. Adult patients (>18 years), who were diagnosed between 1/1/2009 and 30/12/2019 with hematological malignancies and received immunosuppressive therapy were retrieved from the Electronic Health Medical Records. Patients were excluded if they received the PCV13 vaccination during or after initiation of the immunosuppressive therapy. A multivariate logistic regression model was performed to determine the association between PCV13 vaccination and hospital admission due to pneumonia or sepsis.

**Results:** The cohort included 616 patients, of these 418 (67%) patients weren't vaccinated and 198 (33%) were vaccinated. Within 12 months, 15.1% (n=63) of non-vaccinated patients compared to only 7.1% (n=14) of the vaccinated patients were hospitalized due pneumonia or sepsis. The logistic regression analysis demonstrated that receiving PCV13 vaccination is associated with reduced odds of 45% (OR 0.45, CI95%: 0.246-0.839, p =0.012) of being hospitalized due to pneumonia or sepsis in patients with hematological malignancies receiving immunosuppressive therapy.

**Conclusion:** This is the first study to demonstrate the contribution of PCV13 vaccine in patients with hematological malignancies receiving immunosuppressive therapy. Patients vaccinated with PCV13 had significantly reduce odds of hospitalization due to pneumonia or sepsis compared to non PCV13 vaccinated patients.

1  
2 **Article Summary:**  
3

4 Strengths and limitations of this study:  
5

- 6
- 7 • First study to demonstrate the role of PCV13 vaccination in patient with hematological  
8 malignancies in reducing hospital admissions due to pneumonia or sepsis  
9
  - 10 • Demonstrate the effectiveness of vaccination prior to immunosuppressive therapy in  
11 patients with hematological malignancies.  
12
  - 13 • The study is not a randomized controlled study  
14
  - 15 • Control group consisted historical controls  
16  
17  
18  
19  
20  
21  
22  
23  
24  
25  
26  
27  
28  
29  
30  
31  
32  
33  
34  
35  
36  
37  
38  
39  
40  
41  
42  
43  
44  
45  
46  
47  
48  
49  
50  
51  
52  
53  
54  
55  
56  
57  
58  
59  
60

## **Introduction**

Hematological malignancies are the 5<sup>th</sup> cause of cancer in the US and the 4<sup>th</sup> cause of cancer related deaths (1). The lifetime probability to develop Non-Hodgkin Lymphoma (NHL) in the US is 1 in 42 for males, and 1 in 54 for females (1). The age adjusted mortality rate from NHL is 4.4/100,000 for females and 7.3/100,000 for males (1). The underlying malignancy and the immunosuppressive therapy place people at risk for severe infection, which is a frequent cause of death. Patients with Multiple Myeloma (MM), for example, have frequent infectious complications resulting in death in approximately 45% of the patients, two-thirds of these infections are due to pneumonia (2). In a national level US study, the cumulative incidence of severe sepsis was 43 cases per 1000 people living with NHL (3). The relative risk of severe sepsis in those with NHL was 10 times greater than observed in the non-cancer population (3).

In patients with hematological malignancies, several factors predispose to infectious complications, including immune deficiencies associated with the primary malignancy and the use of multiple lines of cytotoxic therapy that are frequently associated with prolonged neutropenia and bone marrow failure. These complications usually lead to increased risk of serious infections requiring hospitalization (4) (5).

One of the most serious infectious complications is Invasive Pneumococcal Disease (IPD), defined as isolation of *Streptococcus Pneumonia* (SP) from a normally sterile body site (typically blood or cerebrospinal fluid) (6). Among adults with hematological malignancies, the IPD incidence is estimated to be 0.5% per year since diagnosis, 50-fold higher than in the general population (7).

Primary prevention of IPD relies on two available pneumococcal vaccines: The pneumococcal 13-valent conjugated vaccine (PCV13), and the pneumococcal 23-valent polysaccharide vaccine (PPSV23). A low antibody response to PPSV23 has been described in the general elderly population as well as in patients with hematologic malignancies, including patients with multiple myeloma and lymphoma (8). PCV13, however, demonstrates a greater immunogenicity through a T cell dependent response, leading to longer lasting immunologic memory (2).

1  
2 The effectiveness of Pneumococcal Conjugate Vaccine (PCV13) in preventing pneumonia was  
3  
4 demonstrated in the community based CAPITA study, with 84,496 adults over 65 years of age (9).  
5  
6 The CAPITA study showed a vaccine efficacy of 45.6% to prevent community acquired  
7  
8 pneumonia and 75% to prevent IPD (9). Other studies, performed with the PPSV23 have revealed  
9  
10 less than 40% protective antibody levels after vaccination (10)(11).  
11  
12

13  
14 The Infectious Diseases Society of America (IDSA), as well as other organizations, such as the  
15  
16 Israel Ministry of Health (MoH), published recommendations regarding the vaccination of  
17  
18 immunocompromised patients (8). The proper timing of immunization in cancer patients is a key  
19  
20 component of achieving efficient vaccine protection. In general, patients with malignancy should  
21  
22 receive the PPSV23 four to six weeks prior to chemotherapy, and no later than two weeks prior to  
23  
24 chemotherapy initiation. The PCV13 vaccination is given as a single dose in addition to  
25  
26 PPSV23(12,13).  
27  
28

29  
30 The immune response following PCV13 vaccination in patients with hematological malignancies  
31  
32 was evaluated (11,12). PCV13 vaccination in Chronic Lymphocytic Leukemia (CLL) patients, for  
33  
34 example, induces an immune response in a considerable proportion of patients (58%) although less  
35  
36 than in healthy controls (100%) (14). Individuals with Multiple Myeloma (MM) have historically  
37  
38 received the PPSV23 vaccination, but this has usually resulted in a suboptimal immune response,  
39  
40 most probably due to a defect in their humoral immunity system (2). Poor immune function and  
41  
42 suboptimal response to pneumococcal vaccine, which contribute to the high rates and increased  
43  
44 IPD- related mortality, were observed in patients with hematological malignancies and patients  
45  
46 following organ or bone marrow transplantation (7).  
47  
48

49  
50 Several unresolved questions are still present regarding the use of PCV13 in various groups of  
51  
52 patients. The effectiveness of PCV13 vaccine in preventing IPD prior to the initiation of  
53  
54 immunosuppressive therapy in patients with hematological malignancies has not been rigorously  
55  
56 tested. Additionally, a paucity of data exists regarding the vaccine effectiveness in patients treated  
57  
58  
59  
60



1 with targeted therapy against B or T lymphocytes (15). In this paper we conducted a retrospective  
2 cohort design to assess whether vaccinating hematological patients with PCV13 prior to  
3 chemotherapy and/or biological therapy initiation is associated with decreased hospital admissions  
4 due to pneumonia or sepsis within 12 months.  
5  
6  
7  
8  
9

## 10 **Methods**

11  
12  
13  
14 ***Study design and setting:*** A longitudinal retrospective cohort study was conducted at the  
15 Hematology Unit, Carmel Medical Center (CMC), Haifa, Israel, between January 1<sup>st</sup>, 2009 and  
16 December 30<sup>th</sup>, 2019. The data was retrieved from the Electronic Health Medical Records and the  
17 computerized databases of Clalit Health Services (CHS). Retrieved data included patients' clinical  
18 and personal characteristics, namely vaccination status, hospitalization (dates and cause), and type  
19 of therapy (chemotherapy and/or biological therapy). The study was approved by the Carmel  
20 Medical Center Helsinki Committee (CMC-20-0005) and by the Faculty of Social Welfare and  
21 Health Sciences Ethic Committee, University of Haifa (approval no. 351/20).  
22  
23  
24  
25  
26  
27  
28  
29  
30  
31

32  
33 ***Study population:*** The study population included patients with hematological malignancies (with  
34 the exception of acute leukemia patients). PCV13 vaccination was recommended to all patients as  
35 soon as it became available for general use, namely, as of June 1<sup>st</sup>, 2016. This retrospective analysis  
36 included two groups of patients: those who did not receive the PCV13 vaccination and patients  
37 who received PCV13 vaccination prior to initiation of immunosuppressive therapy.  
38  
39  
40  
41  
42  
43  
44  
45

### 46 ***Patient and public involvement:***

47  
48 This is a retrospective study and therefore there was no patient involvement.  
49  
50

51 ***Inclusion and exclusion criteria:*** The study included records of patients over 18 years old who  
52 have received chemotherapy and/or biological therapy. We excluded patients who were not  
53 members of CHS due to unavailability of follow-up data. We also excluded patients with acute  
54 leukemia, due to the paucity of patients and the aggressive nature of the disease, and patient who  
55 received the PCV13 vaccination after immunosuppressive therapy was commenced.  
56  
57  
58  
59  
60

1  
2 **Study variables:** the dependent variable was the first hospitalization due to pneumonia or sepsis  
3  
4 within 12 months after initiation of biologic therapy and/or chemotherapy. The decision regarding  
5  
6 patient hospitalization due to pneumonia or sepsis was made according to the diagnosis on  
7  
8 discharge documentation, based on the following criteria: fever, dyspnea, leukocytosis, and chest  
9  
10 x-ray.  
11

12  
13  
14 The independent variable was vaccination with PCV13.  
15

16  
17 Control variables included demographic variables such as age, gender, country of birth, marital  
18  
19 status (e.g., married, single or lives alone), and place of living. General clinical variables included  
20  
21 functional status according to ECOG (Eastern Cooperative Oncology Group) performance scale  
22  
23 (16). Disease - specific clinical variables: age at treatment, primary hematological disease  
24  
25 (Lymphoproliferative disease, Myeloproliferative disease and Multiple Myeloma); type of  
26  
27 immunosuppressive therapy (chemotherapy and/or biological therapy); risk of severe neutropenia  
28  
29 (<500 neutrophils/ul) - high, moderate or low (more than 7 days, less than 7 days, no neutropenia),  
30  
31 and splenectomy status (17).  
32  
33  
34  
35

36 **Vaccination procedure:** The PCV13 vaccination procedure was commenced at CMC on June 1<sup>st</sup>,  
37  
38 2016 and included an intramuscular injection of 0.5 ml of polysaccharides from 13 pneumococcal  
39  
40 serotypes conjugated to a nontoxic diphtheria toxin (Prevenar, Pfizer USA).  
41  
42

43 **Statistical Analyses:** Descriptive statistics (frequency, means and standard deviation) were  
44  
45 performed to describe patients' demographic and clinical characteristics. Statistical significance of  
46  
47 differences and associations between vaccinated and non-vaccinated patients, and between those  
48  
49 who were or were not hospitalized due to pneumonia or sepsis within 12 months of treatment  
50  
51 initiation were analyzed using a *Student t test* for continuous variables and  $\chi^2$  test for categorical  
52  
53 variables. To determine the contribution of the PCV13 vaccine to the risk for first hospitalization  
54  
55 due to pneumonia or sepsis within 12 months, a multivariate logistic regression model controlling  
56  
57 for known confounders was performed. Variables were entered into the regression model if a  
58  
59  
60

1 statistical significant association (p-value < 0.05) was found in the bivariate associations with the  
2 dependent variable. All statistical analyses were carried out using SPSS statistical software version  
3  
4  
5  
6 23.  
7

8  
9 Extra data is available by emailing [reginada2@clalit.org.il](mailto:reginada2@clalit.org.il)  
10  
11  
12  
13  
14

## 15 **Results**

16  
17  
18 The study population included 616 patients, of these, 67% (n=418) patients who did not receive  
19 PCV13 vaccine and 33% (n=198) who received PCV13 vaccine prior to initiation of  
20 immunosuppressive therapy.  
21  
22  
23  
24

25 Table 1 describes the participants' socio-demographic and clinical characteristics. Among non-  
26 vaccinated patients: 36.8% were aged between 18–65 years, 32.8% were between 66–75 years, and  
27 30.4% were older than 76 years (Table 1). In the vaccinated group 41.4% were aged between 18–  
28 65 years, 33.3% were between 66–75 years, and 25.3% were older than 76 years (p=0.372). More  
29 independent patients (according to ECOG performance score) were documented in the vaccinated  
30 patient's group compared to the non-vaccinated (98% vs. 91.1%, p=0.001). The most prevalent  
31 hematological diagnosis was Lymphoid Malignancy (76.1% among the non-vaccinated and 80.8%  
32 among the vaccinated), followed by Multiple Myeloma (16.3% among the non-vaccinated and  
33 16.7% among the vaccinated), and Myeloid Malignancy (7.7% among the non-vaccinated and  
34 2.5% among the vaccinated). Most of the patients had a moderate risk for neutropenic fever (non-  
35 vaccinated – 80.1%, vaccinated – 77.3%).  
36  
37  
38  
39  
40  
41  
42  
43  
44  
45  
46  
47  
48  
49  
50

51 Table 2 presents the association between the demographic and clinical characteristics and the rate  
52 of hospitalization due to pneumonia or sepsis within 12 months after immunosuppressive therapy  
53 initiation. Among patients that were admitted within 12 months after therapy initiation, due to  
54 pneumonia or sepsis, non-vaccinated patients were the vast majority (81.8% vs. 18.2% p=0.005).  
55  
56  
57  
58  
59  
60

A significant association was found between age at treatment and hospitalization rates. As

1 anticipated, in both groups patients older than 76 years of age had higher rates of hospitalization  
2 compared to younger patients between 18 and 65 years of age ( $p=0.014$ ). The highest rates of  
3 hospitalization were found among the Myeloid Malignancy patients and Multiple Myeloma  
4 compared to Lymphoid Malignancy patients ( $p=0.01$ ).  
5  
6  
7  
8  
9

10  
11 Table 3 shows a logistic regression analysis of factors associated with 12-month hospitalization  
12 due to pneumonia or sepsis. Vaccinated patients had reduced odds of hospitalization due to  
13 pneumonia or sepsis within 12 months since treatment initiation (OR=0.45, CI 95%: 0.246-0.839,  
14 P=0.012). Additionally, older age (76+) was associated with increased hospitalization odds  
15 relatively to the 19-65 age group (OR=2.082, CI 95%: 1.102-3.934,  $p=0.024$ ). The type of  
16 hematological malignancy was not significantly associated with the odds of hospitalization.  
17  
18  
19  
20  
21  
22  
23  
24  
25  
26  
27

## 28 Discussion

29  
30 In this study we investigated the association between PCV13 vaccination and hospital admissions  
31 due to pneumonia or sepsis in a cohort of patients with hematological malignancies, within 12  
32 months since initiation of therapy. This study is the first to demonstrate in a large cohort of patients  
33 with hematological malignancies that PCV13 vaccine administration prior to immunosuppressive  
34 therapy is associated with reduced odds for hospital admission due to pneumonia or sepsis, and  
35 that vaccination has a protective effect of 45.4% in preventing hospitalization. These significant  
36 results support the latest IDSA recommended guidelines to vaccinate patients with hematological  
37 malignancies with PCV13 prior to immunosuppressive therapy, which later have been also adopted  
38 by international officials, such as The Ministry of Health of Israel (18)(19).  
39  
40  
41  
42  
43  
44  
45  
46  
47  
48  
49  
50

51  
52 Prior to our study, the effectiveness of PCV13 in preventing pneumonia was only demonstrated in  
53 the community based CAPITA study (20). Although patients undergoing immunosuppressive  
54 therapy were previously recommended to be vaccinated with PCV13 prior treatment initiation (12),  
55  
56  
57  
58  
59  
60

1 no study has demonstrated the clinical benefit in reducing severe pneumonia or sepsis, and hospital  
2 admissions following vaccination with PCV13 in these patients.  
3

4  
5  
6  
7 As anticipated, factors other than PCV13 vaccination also influence the risk of admission due to  
8 pneumonia or sepsis (21). In our cohort age >65 years old and the type of malignancy were  
9 associated with increased risk for hospital admission due to pneumonia or sepsis, in the bivariate  
10 analysis. The regression analysis demonstrated, however, that the PCV13 vaccination has a  
11 protective effect controlling for age and the type of malignancy. The IPD incidence among  
12 hematological malignancy patients is 0.5% per year which is 50-fold higher than in the general  
13 population (7). However, no data was found regarding hospitalization rates due to IPD or sepsis in  
14 patients with hematological malignancies.  
15  
16  
17  
18  
19  
20  
21  
22  
23  
24  
25

26 Strengths and limitations: The main strength of our study is our ability to retrieve accurate  
27 information on all hospital admissions in a large cohort of patients treated in our medical center  
28 over a period of 10 years. Although we did not use a randomized control trial design, our findings  
29 demonstrate similarity in sociodemographic and clinical characteristics between vaccinated and  
30 non-vaccinated patients, except for type of disease, treatment modalities, and functional  
31 dependency. This difference might have been the result of differences in patients' age and thus  
32 differences by disease were no longer statistically significant after controlling for age groups in the  
33 multivariate regression. Treatment modalities differences between vaccinated and non-vaccinated  
34 treatment might be explained by the mix of patients' malignancies and changes in treatment  
35 protocols over the last decade, namely the use of a combination of biological and chemotherapy  
36 treatment. This change is in concomitant with patients' vaccination. Notably, these differences lost  
37 significance regarding hospital admission in the regression analysis.  
38  
39  
40  
41  
42  
43  
44  
45  
46  
47  
48  
49  
50  
51  
52  
53

54 This study demonstrates for the first time the association between PCV13 vaccination in a group  
55 of patients with high risk for infection, patients with hematological malignancies and adverse  
56 outcomes, such as infections requiring hospitalization. This simple procedure has a significant  
57  
58  
59  
60

1  
2 implication on infectious complications related to the immunosuppressive therapy, hence has a  
3  
4 great impact on the morbidity and maybe on mortality rates in these patients. Further research on  
5  
6 large cohort of patients, stratifying by diverse risk factors and RCT design is needed in order to  
7  
8 examine the PCV13 vaccination outcomes regarding hospitalization, survival rates, and  
9  
10 economical costs.  
11  
12  
13  
14  
15  
16

### 17 **Contribution Statement:**

18  
19 R.D. perform the data collection, analysis and writing the manuscript; E.D. E.S. M.P. designed the  
20  
21 study analyzed the data and wrote the manuscript. There are no relevant conflict of interest for  
22  
23 R.D.; E.D.; E.S.; M.P. The authors declare that they had no external or internal funding to perform  
24  
25 the study.  
26  
27  
28  
29

### 30 **Data sharing statement:**

31  
32 The authors confirm that the data supporting the findings of this study are available within the  
33  
34 article. Identifiable Individual participant data will not be available however aggregated,  
35  
36 anonymized data will be available on request from the corresponding author.  
37  
38  
39

### 40 **Ethics statement:**

41  
42 The study was approved by the Carmel Medical Center Helsinki Committee (CMC-20-0005) and  
43  
44 by the Faculty of Social Welfare and Health Sciences Ethic Committee, University of Haifa  
45  
46 (approval no. 351/20).  
47  
48  
49  
50  
51  
52  
53  
54  
55  
56  
57  
58  
59  
60

## References:

1. Siegel RL, Miller KD, Jemal A. Cancer statistics, 2019. *CA Cancer J Clin*. 2019 Jan 8;69(1):7–34.
2. Mustafa SS, Shah D, Bress J, Jamshed S. Response to PCV13 vaccination in patients with multiple myeloma versus healthy controls. *Hum Vaccin Immunother*. 2019;15(2):452–454.
3. Williams MD, Braun LA, Cooper LM, Johnston J, Weiss RV, Qualy RL, et al. Hospitalized cancer patients with severe sepsis: analysis of incidence, mortality, and associated costs of care. *Crit Care*. 2004 Oct;8(5):R291–8.
4. Griffiths H, Lea J, Bunch C, Lee M, Chapel H. Predictors of infection in chronic lymphocytic leukaemia (CLL). *Clin Exp Immunol*. 1992 Sep;89(3):374–377.
5. Perkins JG, Flynn JM, Howard RS, Byrd JC. Frequency and type of serious infections in fludarabine-refractory B-cell chronic lymphocytic leukemia and small lymphocytic lymphoma: implications for clinical trials in this patient population. *Cancer*. 2002 Apr 1;94(7):2033–2039.
6. Thigpen MC, Whitney CG, Messonnier NE, Zell ER, Lynfield R, Hadler JL, et al. Bacterial meningitis in the United States, 1998–2007. *N Engl J Med*. 2011 May 26;364(21):2016–2025.
7. Klemets P, Lyytikäinen O, Ruutu P, Ollgren J, Nuorti JP. Invasive pneumococcal infections among persons with and without underlying medical conditions: implications for prevention strategies. *BMC Infect Dis*. 2008 Jul 22;8:96.
8. Wong A, Marrie TJ, Garg S, Kellner JD, Tyrrell GJ, SPAT Group. Increased risk of invasive pneumococcal disease in haematological and solid-organ malignancies. *Epidemiol Infect*. 2010 Dec;138(12):1804–1810.
9. McLaughlin JM, Jiang Q, Isturiz RE, Sings HL, Swerdlow DL, Gessner BD, et al. Effectiveness of 13-Valent Pneumococcal Conjugate Vaccine Against Hospitalization for Community-Acquired Pneumonia in Older US Adults: A Test-Negative Design. *Clin Infect Dis*. 2018 Oct 30;67(10):1498–1506.
10. Robertson JD, Nagesh K, Jowitt SN, Dougal M, Anderson H, Mutton K, et al. Immunogenicity of vaccination against influenza, *Streptococcus pneumoniae* and *Haemophilus influenzae* type B in patients with multiple myeloma. *Br J Cancer*. 2000 Apr;82(7):1261–1265.
11. Levine AM, Overturf GD, Field RF, Holdorf D, Paganini-Hill A, Feinstein DI. Use and efficacy of pneumococcal vaccine in patients with Hodgkin disease. *Blood*. 1979 Nov;54(5):1171–1175.
12. Tsigrelis C, Ljungman P. Vaccinations in patients with hematological malignancies. *Blood Rev*. 2016 Mar;30(2):139–147.
13. Tsang V. Vaccination recommendations for the hematology and oncology and post-stem cell transplant populations. *J Adv Pract Oncol*. 2012 Mar;3(2):71–83.
14. Pasiarski M, Rolinski J, Grywalska E, Stelmach-Goldys A, Korona-Glowniak I, Gozdz S, et al. Antibody and plasmablast response to 13-valent pneumococcal conjugate vaccine in

- 1 chronic lymphocytic leukemia patients--preliminary report. PLoS One. 2014 Dec  
2 15;9(12):e114966.  
3  
4  
5 15. Ariza-Heredia EJ, Chemaly RF. Practical review of immunizations in adult patients with  
6 cancer. Hum Vaccin Immunother. 2015 Jun 25;11(11):2606–2614.  
7  
8 16. Oken MM, Creech RH, Tormey DC, Horton J, Davis TE, McFadden ET, et al. Toxicity and  
9 response criteria of the Eastern Cooperative Oncology Group. Am J Clin Oncol. 1982  
10 Dec;5(6):649–655.  
11  
12 17. Baden LR, Swaminathan S, Angarone M, Blouin G, Camins BC, Casper C, et al.  
13 Prevention and Treatment of Cancer-Related Infections, Version 2.2016, NCCN Clinical  
14 Practice Guidelines in Oncology. J Natl Compr Canc Netw. 2016;14(7):882–913.  
15  
16 18. Rubin LG, Levin MJ, Ljungman P, Davies EG, Avery R, Tomblyn M, et al. 2013 IDSA  
17 clinical practice guideline for vaccination of the immunocompromised host. Clin Infect  
18 Dis. 2014 Feb;58(3):e44–100.  
19  
20 19. Israel Ministry of Health - Vaccination Guide [Internet]. 2014 [cited 2020 Jun 4]. Available  
21 from: [https://www.health.gov.il/Subjects/vaccines/Pages/tadrich\\_Chisunim.aspx](https://www.health.gov.il/Subjects/vaccines/Pages/tadrich_Chisunim.aspx)  
22  
23 20. Bonten MJM, Huijts SM, Bolkenbaas M, CAPITA Coauthors. Vaccine against  
24 Pneumococcal Pneumonia in Adults. N Engl J Med. 2015 Jul 2;373(1):93.  
25  
26 21. Wong JL, Evans SE. Bacterial Pneumonia in Patients with Cancer: Novel Risk Factors and  
27 Management. Clin Chest Med. 2017 Jun;38(2):263–277.  
28  
29  
30  
31  
32  
33  
34  
35  
36  
37  
38  
39  
40  
41  
42  
43  
44  
45  
46  
47  
48  
49  
50  
51  
52  
53  
54  
55  
56  
57  
58  
59  
60



**Table 1:** Demographic and clinical characteristics of vaccinated and non-vaccinated patients

| Variable                       | Non-Vaccinated<br>(n=418, 67%) | Vaccinated<br>(n=198, 33%) | P value |
|--------------------------------|--------------------------------|----------------------------|---------|
| <b>Gender</b>                  | N (%)                          | N (%)                      | 0.219   |
| Male                           | 229 (54.8%)                    | 98 (49.5%)                 |         |
| Female                         | 189 (45.2%)                    | 100 (50.5%)                |         |
| <b>Country of Birth</b>        |                                |                            | 0.079   |
| Israel                         | 209 (50%)                      | 114(57.6%)                 |         |
| Not Israel                     | 209 (50%)                      | 84(42.4%)                  |         |
| <b>Living area</b>             |                                |                            | 0.621   |
| City                           | 318(76.1%)                     | 147(74.2%)                 |         |
| Rural                          | 100(23.9%)                     | 51(25.8%)                  |         |
| <b>Family status</b>           |                                |                            | 0.773   |
| Married                        | 319(76.3%)                     | 149(75.3%)                 |         |
| Not married                    | 99(23.7%)                      | 49(24.7%)                  |         |
| <b>Splenectomy</b>             |                                |                            | 0.309   |
| Yes                            | 6(1.4%)                        | 1(0.5%)                    |         |
| No                             | 412(98.6%)                     | 197(99.5%)                 |         |
| <b>Hematological diagnosis</b> |                                |                            | 0.043   |
| Lymphoid Malignancy            | 318(76.1%)                     | 160(80.8%)                 |         |
| Myeloid Malignancy             | 32(7.7%)                       | 5(2.5%)                    |         |
| Multiple Myeloma               | 68(16.3%)                      | 33(16.7%)                  |         |
| <b>Age at treatment</b>        |                                |                            | 0.372   |
| 19-65                          | 154(36.8%)                     | 82(41.4%)                  |         |
| 66-75                          | 137(32.8%)                     | 66(33.3%)                  |         |
| 76+                            | 127(30.4%)                     | 50(25.3%)                  |         |
| <b>ECOG performance score</b>  |                                |                            | 0.001   |
| Dependent                      | 37(8.9%)                       | 4(2%)                      |         |
| Not Dependent                  | 381(91.1%)                     | 194(98%)                   |         |
| <b>Treatment type</b>          |                                |                            | 0.035   |
| Chemotherapy                   | 131(31.3%)                     | 49(24.7%)                  |         |
| Biological                     | 19(4.5%)                       | 18(9.1%)                   |         |
| Combined treatment             | 268(64.1%)                     | 131(66.2%)                 |         |
| <b>Risk Neutropenic fever</b>  |                                |                            | 0.098   |
| High risk                      | 65(15.6%)                      | 28(14.1%)                  |         |
| Moderate risk                  | 335(80.1%)                     | 153(77.3%)                 |         |
| Low risk                       | 18(4.3%)                       | 17(8.6%)                   |         |

ECOG – Eastern Cooperative Oncology Group performance status

**Table 2:** Association between demographic and clinical characteristic and hospitalization rates due to pneumonia or sepsis within 12 months

|                                | No Admission<br>within 12<br>months | Admission within<br>12 months | P-value |
|--------------------------------|-------------------------------------|-------------------------------|---------|
|                                | N (%)                               | N (%)                         |         |
| <b>Vaccination status</b>      |                                     |                               | 0.005   |
| Vaccinated                     | 184(43.1%)                          | 14(18.2%)                     |         |
| Non-vaccinated                 | 335(65.9%)                          | 63(81.8%)                     |         |
| <b>Gender</b>                  |                                     |                               | 0.446   |
| Male                           | 283(52.5%)                          | 44(57.1%)                     |         |
| Female                         | 256(47.5%)                          | 33(42.9%)                     |         |
| <b>Hematological diagnosis</b> |                                     |                               | 0.010   |
| Lymphoid Malignancy            | 428(79.4%)                          | 50(64.9%)                     |         |
| Myeloid Malignancy             | 28(5.2%)                            | 9(11.7%)                      |         |
| Multiple Myeloma               | 83(15.4%)                           | 18(23.4%)                     |         |
| <b>Country of Birth</b>        |                                     |                               | 0.410   |
| Israel                         | 286(53.1%)                          | 37(48.1%)                     |         |
| No Israel                      | 253(46.9%)                          | 40(51.9%)                     |         |
| <b>Family status</b>           |                                     |                               | 0.476   |
| Not married                    | 132(24.5%)                          | 16(20.8%)                     |         |
| Married                        | 407(75.5%)                          | 61(79.2%)                     |         |
| <b>Living area</b>             |                                     |                               | 0.972   |
| City                           | 407(75.5%)                          | 58(75.3%)                     |         |
| Rural                          | 132(24.5%)                          | 19(24.7%)                     |         |
| <b>ECOG performance score</b>  |                                     |                               | 0.359   |
| Dependent                      | 34(6.3%)                            | 7(9.1%)                       |         |
| Not Dependent                  | 505(93.7%)                          | 70(90.9%)                     |         |
| <b>Risk Neutropenic fever</b>  |                                     |                               | 0.975   |
| High risk                      | 81(15%)                             | 12(15.6%)                     |         |
| Moderate risk                  | 427(79.2%)                          | 61(79.2%)                     |         |
| Low risk                       | 31(5.8%)                            | 4(5.2%)                       |         |
| <b>Splenectomy</b>             |                                     |                               | 0.886   |
| No                             | 533(98.9%)                          | 76(98.7%)                     |         |
| Yes                            | 6(1.1%)                             | 1(1.3%)                       |         |
| <b>Treatment type</b>          |                                     |                               | 0.635   |
| Biological treatment           | 33(6.1%)                            | 4(5.2%)                       |         |
| Chemotherapy treatment         | 154(28.6%)                          | 26(33.8%)                     |         |
| Combination treatment          | 352(65.3%)                          | 47(61%)                       |         |
| <b>Age at treatment</b>        |                                     |                               | 0.014   |
| 19-65                          | 218(40.4%)                          | 18(23.4%)                     |         |
| 66-75                          | 173(32.1%)                          | 30(39%)                       |         |
| 76+                            | 148(27.5%)                          | 29(37.7%)                     |         |

\*ECOG – Eastern Cooperative Oncology Group performance status

**Table 3:** Logistic regression analysis of factors associated with 12 month hospitalization due to pneumonia or sepsis

| Variable                              | OR    | 95% CI<br>(Lower | Upper) | P-value |
|---------------------------------------|-------|------------------|--------|---------|
| <b>Non-Vaccinated<br/>(reference)</b> |       |                  |        |         |
| <b>Vaccinated</b>                     | 0.454 | 0.246            | 0.839  | 0.012   |
| <b>Age at treatment</b>               |       |                  |        |         |
| 19-65 (reference)                     |       |                  |        |         |
| 66-75                                 | 1.915 | 1.022            | 3.588  | 0.043   |
| 76+                                   | 2.082 | 1.102            | 3.934  | 0.024   |
| <b>Hematological diagnosis</b>        |       |                  |        |         |
| Lymphoid Malignancy<br>(reference)    |       |                  |        |         |
| Multiple Myeloma                      | 1.704 | 0.936            | 3.101  | 0.081   |
| Myeloid Malignancy                    | 2.092 | 0.919            | 4.762  | 0.079   |

# BMJ Open

## Association between PCV13 pneumococcal vaccination and risk of hospital admissions due to pneumonia or sepsis among patients with hematological malignancies: a single-center retrospective cohort study in Israel

|                                 |                                                                                                                                                                                                                                                                                                                         |
|---------------------------------|-------------------------------------------------------------------------------------------------------------------------------------------------------------------------------------------------------------------------------------------------------------------------------------------------------------------------|
| Journal:                        | <i>BMJ Open</i>                                                                                                                                                                                                                                                                                                         |
| Manuscript ID                   | bmjopen-2021-056986.R1                                                                                                                                                                                                                                                                                                  |
| Article Type:                   | Original research                                                                                                                                                                                                                                                                                                       |
| Date Submitted by the Author:   | 28-Jan-2022                                                                                                                                                                                                                                                                                                             |
| Complete List of Authors:       | Draliuk, Regina; University of Haifa, Department of Nursing; Lady Davis Carmel Medical Center<br>Shadmi, Efrat ; University of Haifa Faculty of Social Welfare and Health Sciences<br>Preis, Meir ; Lady Davis Carmel Medical Center<br>Dagan, Efrat; University of Haifa Faculty of Social Welfare and Health Sciences |
| <b>Primary Subject Heading</b>: | Haematology (incl blood transfusion)                                                                                                                                                                                                                                                                                    |
| Secondary Subject Heading:      | Infectious diseases                                                                                                                                                                                                                                                                                                     |
| Keywords:                       | HAEMATOLOGY, Lymphoma < HAEMATOLOGY, Myeloma < HAEMATOLOGY                                                                                                                                                                                                                                                              |
|                                 |                                                                                                                                                                                                                                                                                                                         |

SCHOLARONE™  
Manuscripts



I, the Submitting Author has the right to grant and does grant on behalf of all authors of the Work (as defined in the below author licence), an exclusive licence and/or a non-exclusive licence for contributions from authors who are: i) UK Crown employees; ii) where BMJ has agreed a CC-BY licence shall apply, and/or iii) in accordance with the terms applicable for US Federal Government officers or employees acting as part of their official duties; on a worldwide, perpetual, irrevocable, royalty-free basis to BMJ Publishing Group Ltd ("BMJ") its licensees and where the relevant Journal is co-owned by BMJ to the co-owners of the Journal, to publish the Work in this journal and any other BMJ products and to exploit all rights, as set out in our [licence](#).

The Submitting Author accepts and understands that any supply made under these terms is made by BMJ to the Submitting Author unless you are acting as an employee on behalf of your employer or a postgraduate student of an affiliated institution which is paying any applicable article publishing charge ("APC") for Open Access articles. Where the Submitting Author wishes to make the Work available on an Open Access basis (and intends to pay the relevant APC), the terms of reuse of such Open Access shall be governed by a Creative Commons licence – details of these licences and which [Creative Commons](#) licence will apply to this Work are set out in our licence referred to above.

Other than as permitted in any relevant BMJ Author's Self Archiving Policies, I confirm this Work has not been accepted for publication elsewhere, is not being considered for publication elsewhere and does not duplicate material already published. I confirm all authors consent to publication of this Work and authorise the granting of this licence.

1  
2  
3  
4  
5  
6  
7  
8  
9  
10  
11  
12  
13  
14  
15  
16  
17  
18  
19  
20  
21  
22  
23  
24  
25  
26  
27  
28  
29  
30  
31  
32  
33  
34  
35  
36  
37  
38  
39  
40  
41  
42  
43  
44  
45  
46  
47  
48  
49  
50  
51  
52  
53  
54  
55  
56  
57  
58  
59  
60

# Association between PCV13 pneumococcal vaccination and risk of hospital admissions due to pneumonia or sepsis among patients with hematological malignancies: a single-center retrospective cohort study in Israel

Regina Draliuk<sup>1,2</sup>, Efrat Shadmi<sup>1</sup>, Meir Preis<sup>2,3</sup>, Efrat Dagan<sup>1</sup>

1. The Cheryl Spencer Department of Nursing, University of Haifa, Haifa, Israel
2. Institute of Hematology, Lady Davis Carmel Medical Center, Haifa, Israel
3. Bruce and Ruth Rappaport Faculty of Medicine, Technion, Haifa, Israel

## **Corresponding author:**

Draliuk Regina, MA, RN

Head Nurse, Institute of Hematology

Carmel Medical Center, 7 Michal St, Haifa, Israel

Email: [reginada2@clalit.org.il](mailto:reginada2@clalit.org.il)

Phone: +972-4-8250445

Fax: +972-4-8250701

**Key Words:** Hematological malignancies, PCV13, Hospital admissions

**Word Count:** 3135

## **Abstract**

**Objectives:** Patients with hematological malignancies receiving immunosuppressive therapy are at highest risk for invasive pneumococcal disease. Our goal was to investigate whether vaccination of hematological patients with pneumococcal 13-valent conjugated vaccine (PCV13) prior to therapy initiation is associated with decreased hospital admissions due to pneumonia or sepsis within 12 months.

**Design & Setting:** A longitudinal retrospective cohort study was conducted at the Hematology Unit, Carmel Medical Center, Israel.

**Participants:** Information on adult patients (>18 years), who were diagnosed between 1/1/2009 and 30/12/2019 with hematological malignancies and received immunosuppressive therapy, was retrieved from the electronic health records. Patients with hematological malignancies who received the PCV13 vaccination during or after initiation of the immunosuppressive therapy were excluded from the study.

**Outcome measures:** A multivariate logistic regression model was performed to determine whether PCV13 vaccination is associated with fewer hospital admission due to pneumonia or sepsis.

**Results:** The cohort included 616 patients, of which 418 (67%) patients weren't vaccinated and 198 (33%) were vaccinated. Within 12 months, 15.1% (n=63) of non-vaccinated patients compared to only 7.1% (n=14) of the vaccinated patients were hospitalized due pneumonia or sepsis. The logistic regression analysis demonstrated that receiving PCV13 vaccination is associated with reduced odds of 45% (OR 0.45, 95%CI: 0.246-0.839, p=0.012) of being hospitalized due to pneumonia or sepsis in patients with hematological malignancies receiving immunosuppressive therapy.

**Conclusion:** This is the first observational study to demonstrate the association between PCV13 vaccination and hospital admissions in patients with hematological malignancies receiving immunosuppressive therapy. Patients receiving PCV13 vaccination before immunosuppressive

1  
2 therapy initiation had significantly reduced odds of hospitalization due to pneumonia or sepsis  
3  
4 compared to non PCV13 vaccinated patients.  
5  
6  
7  
8  
9  
10  
11  
12  
13  
14  
15  
16  
17  
18  
19  
20  
21  
22  
23  
24  
25  
26  
27  
28  
29  
30  
31  
32  
33  
34  
35  
36  
37  
38  
39  
40  
41  
42  
43  
44  
45  
46  
47  
48  
49  
50  
51  
52  
53  
54  
55  
56  
57  
58  
59  
60

For peer review only



1  
2 **Article Summary:**

3  
4 Strengths and limitations of this study:

- 5  
6  
7 • The study data is retrieved from Clalit Health Services database, which documents all types  
8 of vaccinations and hospital admissions.  
9  
10  
11 • All hospital admissions due to pneumonia or sepsis were verified by the authors via review  
12 of the patient chart and discharge summary.  
13  
14  
15  
16 • The study is an observational, single-center study and causality cannot be directly inferred.  
17  
18  
19 • The control group consisted of comparable historical controls.  
20  
21  
22  
23  
24  
25  
26  
27  
28  
29  
30  
31  
32  
33  
34  
35  
36  
37  
38  
39  
40  
41  
42  
43  
44  
45  
46  
47  
48  
49  
50  
51  
52  
53  
54  
55  
56  
57  
58  
59  
60

## **Introduction**

Hematological malignancies are the most common cause of cancer related deaths (1). The lifetime probability to develop Non-Hodgkin Lymphoma (NHL) in the US is 1 in 42 for males, and 1 in 54 for females (1). The age adjusted mortality rate from NHL is 4.4/100,000 for females and 7.3/100,000 for males (1). The underlying malignancy and the immunosuppressive therapy place people at risk for severe infection, which is a frequent cause of death. Patients with Multiple Myeloma (MM), for example, have frequent infectious complications resulting in death in approximately 45% of the patients, two-thirds of these infections are due to pneumonia (2). In a national level US study, the cumulative incidence of severe sepsis was 43 cases per 1000 people living with NHL (3). The relative risk of severe sepsis in those with NHL was 10 times greater than observed in the non-cancer population (3).

In patients with hematological malignancies, several factors predispose to infectious complications, including immune deficiencies associated with the primary malignancy and the use of multiple lines of cytotoxic therapy that are frequently associated with prolonged neutropenia and bone marrow failure. These complications usually lead to increased risk of serious infections requiring hospitalization (4) (5).

One of the most serious infectious complications is Invasive Pneumococcal Disease (IPD), defined as isolation of *Streptococcus Pneumonia* (SP) from a normally sterile body site (typically blood or cerebrospinal fluid) (6). Among adults with hematological malignancies, the IPD incidence is estimated to be 0.5% per year since diagnosis, 50-fold higher than in the general population (7).

Primary prevention of IPD relies on two available pneumococcal vaccines: The pneumococcal 13-valent conjugated vaccine (PCV13), and the pneumococcal 23-valent polysaccharide vaccine (PPSV23). A low antibody response to PPSV23 has been described in the general elderly population as well as in patients with hematologic malignancies, including patients with multiple myeloma and lymphoma (8). PCV13, however, demonstrates a greater immunogenicity through a T cell dependent response, leading to longer lasting immunologic memory (2).

1 The effectiveness of Pneumococcal Conjugate Vaccine (PCV13) in preventing pneumonia was  
2 demonstrated in the community based CAPITA study, with 84,496 adults over 65 years of age (9).  
3  
4 The CAPITA study showed a vaccine efficacy of 45.6% to prevent community acquired  
5 pneumonia and 75% to prevent IPD (9). Other studies, performed with the PPSV23 have revealed  
6  
7 less than 40% protective antibody levels after vaccination (10)(11).  
8  
9  
10  
11  
12

13 The Infectious Diseases Society of America (IDSA), as well as other organizations, such as the  
14 Israel Ministry of Health (MoH), published recommendations regarding the vaccination of  
15 immunocompromised patients (8). The proper timing of immunization in cancer patients is a key  
16 component of achieving efficient vaccine protection. In general, patients with malignancy should  
17 receive the PPSV23 four to six weeks prior to chemotherapy, and no later than two weeks prior to  
18 chemotherapy initiation. The PCV13 vaccination is given as a single dose in addition to  
19 PPSV23(12,13).  
20  
21  
22  
23  
24  
25  
26  
27  
28  
29

30 The immune response following PCV13 vaccination in patients with hematological malignancies  
31 was evaluated (11,12). PCV13 vaccination in Chronic Lymphocytic Leukemia (CLL) patients, for  
32 example, induces an immune response in a considerable proportion of patients (58%) although less  
33 than in healthy controls (100%) (14). Individuals with Multiple Myeloma (MM) have historically  
34 received the PPSV23 vaccination, but this has usually resulted in a suboptimal immune response,  
35 most probably due to a defect in their humoral immunity system (2). Poor immune function and  
36 suboptimal response to pneumococcal vaccine, which contribute to the high rates and increased  
37 IPD- related mortality, were observed in patients with hematological malignancies and patients  
38 following organ or bone marrow transplantation (7).  
39  
40  
41  
42  
43  
44  
45  
46  
47  
48  
49

50 Several unresolved questions are still present regarding the use of PCV13 in various groups of  
51 patients. The effect of PCV13 vaccine in preventing IPD prior to the initiation of  
52 immunosuppressive therapy in patients with hematological malignancies has not been rigorously  
53 tested. Additionally, a paucity of data exists regarding vaccine effectiveness in patients treated with  
54  
55  
56  
57  
58  
59  
60

1 targeted therapy against B or T lymphocytes (15). In this paper we conducted a retrospective cohort  
2 study to assess whether vaccination of hematological patients with PCV13 prior to chemotherapy  
3 and/or biological therapy initiation was associated with decreased hospital admissions due to  
4 pneumonia or sepsis within 12 months of therapy initiation.  
5  
6  
7  
8  
9

## 10 **Methods**

11  
12  
13  
14 ***Study design and setting:*** A longitudinal retrospective cohort study was conducted at the  
15 Hematology Unit, Carmel Medical Center (CMC), Haifa, Israel, between January 1<sup>st</sup>, 2009 and  
16 December 30<sup>th</sup>, 2019. The data was retrieved from the electronic health records and the  
17 computerized databases of Clalit Health Services (CHS). Retrieved data included patients' clinical  
18 and personal characteristics, namely vaccination status, hospitalization (dates and cause), and type  
19 of therapy (chemotherapy and/or biological therapy). The study was approved by the Carmel  
20 Medical Center Helsinki Committee (CMC-20-0005) and by the Faculty of Social Welfare and  
21 Health Sciences Ethic Committee, University of Haifa (approval no. 351/20).  
22  
23  
24  
25  
26  
27  
28  
29  
30  
31

32  
33 ***Study population:*** The study population included patients with hematological malignancies (with  
34 the exception of acute leukemia patients). PCV13 vaccination was recommended to all patients as  
35 soon as it became available for general use, namely, as of June 1<sup>st</sup>, 2016. This retrospective analysis  
36 included two groups of patients: those who did not receive the PCV13 vaccination and patients  
37 who received PCV13 vaccination prior to initiation of immunosuppressive therapy.  
38  
39  
40  
41  
42  
43  
44

45  
46 ***Inclusion and exclusion criteria:*** The study included records of patients over 18 years old who  
47 have received chemotherapy and/or biological therapy. We excluded patients who were not  
48 members of CHS due to unavailability of follow-up data. We also excluded patients with acute  
49 leukemia, due to the paucity of patients and the aggressive nature of the disease, and patient who  
50 received the PCV13 vaccination after immunosuppressive therapy was commenced.  
51  
52  
53  
54  
55  
56  
57

58 ***Study variables:*** the dependent variable was the first hospitalization due to pneumonia or sepsis  
59 within 12 months after initiation of biologic therapy and/or chemotherapy. The EHR of our health  
60

1 care system is very accurate in recording vaccination status. The decision regarding patient  
2 hospitalization due to pneumonia or sepsis was made according to the diagnosis on discharge  
3 documentation, based on the following criteria: fever, dyspnea, leukocytosis, and chest x-ray or  
4 chest CT. Accurate data regarding results of blood cultures was not available due to initiation of  
5 antibiotics therapy prior to drawing blood cultures in a significant proportion of patients. Therefore  
6 we could not accurately assess the proportion of positive blood cultures.  
7  
8  
9  
10  
11  
12  
13  
14  
15  
16  
17  
18

19 The independent variable was vaccination with PCV13.

20  
21 Control variables included demographic variables such as age, gender, country of birth, marital  
22 status (e.g., married, single or lives alone), and place of living. General clinical variables included  
23 functional status according to ECOG (Eastern Cooperative Oncology Group) performance scale  
24 (16). Disease - specific clinical variables: age at treatment, primary hematological disease  
25 (Lymphoproliferative disease, Myeloproliferative disease and Multiple Myeloma); type of  
26 immunosuppressive therapy (chemotherapy and/or biological therapy); risk of severe neutropenia  
27 (<500 neutrophils/ul) - high, moderate or low (more than 7 days, less than 7 days, no neutropenia),  
28 and splenectomy status (17).  
29  
30  
31  
32  
33  
34  
35  
36  
37  
38  
39  
40

41 **Vaccination procedure:** The PCV13 vaccination procedure was commenced at CMC on June 1<sup>st</sup>,  
42 2016 and included an intramuscular injection of 0.5 ml of polysaccharides from 13 pneumococcal  
43 serotypes conjugated to a nontoxic diphtheria toxin (Prevenar, Pfizer USA).  
44  
45  
46  
47  
48

49 **Statistical Analyses:** Descriptive statistics (frequency, means and standard deviation) were  
50 performed to describe patients' demographic and clinical characteristics. Statistical significance of  
51 differences and associations between vaccinated and non-vaccinated patients, and between those  
52 who were or were not hospitalized due to pneumonia or sepsis within 12 months of treatment  
53 initiation were analyzed using a *Student t test* for continuous variables and  $\chi^2$  test for categorical  
54 variables. To determine the contribution of the PCV13 vaccine to the risk for first hospitalization  
55  
56  
57  
58  
59  
60

1  
2 due to pneumonia or sepsis within 12 months, a multivariate logistic regression model controlling  
3  
4 for known confounders was performed. Variables were entered into the regression model if a  
5  
6 statistical significant association ( $p$ -value  $< 0.05$ ) was found in the bivariate associations with the  
7  
8 dependent variable. All statistical analyses were carried out using SPSS statistical software version  
9  
10  
11 23.

### 12 13 14 **Patient and public involvement**

15  
16  
17 There was no patient or public involvement.  
18  
19  
20  
21  
22

### 23 **Results**

24  
25  
26 The study population included 616 patients, of these, 67% ( $n=418$ ) patients who did not receive  
27  
28 PCV13 vaccine and 33% ( $n=198$ ) who received PCV13 vaccine prior to initiation of  
29  
30 immunosuppressive therapy.  
31  
32

33  
34 Table 1 describes the participants' socio-demographic and clinical characteristics. Among non-  
35  
36 vaccinated patients: 36.8% were aged between 18–65 years, 32.8% were between 66–75 years, and  
37  
38 30.4% were older than 76 years (Table 1). In the vaccinated group 41.4% were aged between 18–  
39  
40 65 years, 33.3% were between 66–75 years, and 25.3% were older than 76 years ( $p=0.372$ ). More  
41  
42 independent patients (according to ECOG performance score) were documented in the vaccinated  
43  
44 patient's group compared to the non-vaccinated (98% vs. 91.1%,  $p=0.001$ ). The most prevalent  
45  
46 hematological diagnosis was Lymphoid Malignancy (76.1% among the non-vaccinated and 80.8%  
47  
48 among the vaccinated), followed by Multiple Myeloma (16.3% among the non-vaccinated and  
49  
50 16.7% among the vaccinated), and Myeloid Malignancy (7.7% among the non-vaccinated and  
51  
52 2.5% among the vaccinated). Most of the patients had a moderate risk for neutropenic fever (non-  
53  
54 vaccinated – 80.1%, vaccinated – 77.3%).  
55  
56  
57  
58  
59  
60

1  
2 Table 2 presents the association between the demographic and clinical characteristics and the rate  
3  
4 of hospitalization due to pneumonia or sepsis within 12 months after immunosuppressive therapy  
5  
6 initiation. Among patients that were admitted within 12 months after therapy initiation, due to  
7  
8 pneumonia or sepsis, non-vaccinated patients were the vast majority (81.8% vs. 18.2%  $p=0.005$ ).  
9  
10 A significant association was found between age at treatment and hospitalization rates. As  
11  
12 anticipated, in both groups patients older than 76 years of age had higher rates of hospitalization  
13  
14 compared to younger patients between 18 and 65 years of age ( $p=0.014$ ). The highest rates of  
15  
16 hospitalization were found among the Myeloid Malignancy patients and Multiple Myeloma  
17  
18 compared to Lymphoid Malignancy patients ( $p=0.01$ ).  
19  
20  
21  
22

23 Table 3 shows a logistic regression analysis of factors associated with 12-month hospitalization  
24  
25 due to pneumonia or sepsis. Vaccinated patients had reduced odds of hospitalization due to  
26  
27 pneumonia or sepsis within 12 months since treatment initiation (OR=0.45, CI 95%: 0.246-0.839,  
28  
29  $P=0.012$ ). Additionally, older age (76+) was associated with increased hospitalization odds  
30  
31 relatively to the 19-65 age group (OR=2.082, CI 95%: 1.102-3.934,  $p=0.024$ ). The type of  
32  
33 hematological malignancy was not significantly associated with the odds of hospitalization.  
34  
35  
36  
37  
38  
39

## 40 Discussion

41  
42 In this study we investigated the association between PCV13 vaccination and hospital admissions  
43  
44 due to pneumonia or sepsis in a cohort of patients with hematological malignancies, within 12  
45  
46 months since initiation of therapy. This study is the first to demonstrate in a large cohort of patients  
47  
48 with hematological malignancies that PCV13 vaccine administration prior to immunosuppressive  
49  
50 therapy is associated with reduced odds for hospital admission due to pneumonia or sepsis, and  
51  
52 that vaccination was associated with a 55.6% reduction in odds of hospitalization. These significant  
53  
54 results support the latest IDSA recommended guidelines to vaccinate patients with hematological  
55  
56 malignancies with PCV13 prior to immunosuppressive therapy, which later have been also adopted  
57  
58 by international officials, such as The Ministry of Health of Israel (18)(19).  
59  
60

1  
2 For the study we used the Clalit Health Services data warehouse that comprises information from  
3  
4 patients' electronic health records and administrative data. This is a unique database which  
5  
6 encompasses all records of vaccinations in any care setting as well as patient's demographics, all  
7  
8 clinic visits, disease characteristics, treatment, and hospital admissions. All vaccinations records  
9  
10 were verified by the study authors including vaccine date.  
11  
12

13  
14 Prior to our study, the effectiveness of PCV13 in preventing pneumonia was only demonstrated in  
15  
16 the community based CAPITA study (20). Although patients undergoing immunosuppressive  
17  
18 therapy were previously recommended to be vaccinated with PCV13 prior treatment initiation (12),  
19  
20 no study has demonstrated the clinical benefit in reducing severe pneumonia or sepsis, and hospital  
21  
22 admissions following vaccination with PCV13 in these patients.  
23  
24

25  
26 As anticipated, factors other than PCV13 vaccination also influence the risk of admission due to  
27  
28 pneumonia or sepsis (21). In our cohort age >65 years old and the type of malignancy were  
29  
30 associated with increased risk for hospital admission due to pneumonia or sepsis, in the bivariate  
31  
32 analysis. The regression analysis demonstrated, however, that the PCV13 vaccination has a  
33  
34 protective effect controlling for age and the type of malignancy. The IPD incidence among  
35  
36 hematological malignancy patients is 0.5% per year which is 50-fold higher than in the general  
37  
38 population (7). However, no data was found regarding hospitalization rates due to IPD or sepsis in  
39  
40 patients with hematological malignancies.  
41  
42  
43

44  
45 The main strength of our study is our ability to retrieve accurate information on all hospital  
46  
47 admissions in a large cohort of patients treated in our medical center over a period of 10 years. To  
48  
49 verify that the reason for hospital admissions was pneumonia or sepsis we reviewed the electronic  
50  
51 health record of all study participants. Blood culture data was limited as in a significant proportion  
52  
53 of patients the antibiotic treatment was initiated prior to drawing blood cultures. We therefore could  
54  
55 not make any conclusion regarding the incidence of invasive pneumococcal infection. Although  
56  
57 our retrospective study is inherently limited (compared with a randomized trial), our findings  
58  
59  
60



1 demonstrate similarity in sociodemographic and clinical characteristics between vaccinated and  
2 non-vaccinated patients, except for type of disease, treatment modalities, and functional  
3 dependency. This difference might have been the result of differences in patients' age and thus  
4 differences by disease were no longer statistically significant after controlling for age groups in the  
5 multivariate regression. Treatment modalities differences between vaccinated and non-vaccinated  
6 treatment might be explained by the mix of patients' malignancies and changes in treatment  
7 protocols over the last decade, namely the use of a combination of biological and chemotherapy  
8 treatment. This change is in concomitant with patients' vaccination. Notably, these differences lost  
9 significance regarding hospital admission in the regression analysis.  
10  
11  
12  
13  
14  
15  
16  
17  
18  
19  
20  
21  
22

23 This study demonstrates for the first time the association between PCV13 vaccination in a group  
24 of patients at high risk for infection—patients with hematological malignancies—and risk of  
25 adverse outcomes such as infections requiring hospitalization. Further research in large cohorts of  
26 patients, stratifying by diverse risk factors, and using randomized trial study designs, is needed in  
27 order to examine the PCV13 vaccination outcomes regarding hospitalization, survival rates, and  
28 economic impacts.  
29  
30  
31  
32  
33  
34  
35  
36

### 37 **Contributors**

38 R.D. perform the data collection, analysis and writing the manuscript; E.D. E.S. M.P. designed the  
39 study analyzed the data and wrote the manuscript.  
40  
41  
42  
43  
44

### 45 **Competing interests**

46 We declare no relevant conflicts of interest.  
47  
48  
49

### 50 **Funding**

51 The authors declare that they had no external or internal funding to perform the study.  
52  
53  
54

### 55 **Data availability statement**

1  
2 Identifiable individual participant data will not be available, however, aggregated, anonymized  
3  
4 data will be available on request from the corresponding author.  
5

### 6 7 **Ethics statement**

8  
9 The study was approved by the Carmel Medical Center Helsinki Committee (CMC-20-0005) and  
10  
11 by the Faculty of Social Welfare and Health Sciences Ethic Committee, University of Haifa  
12  
13 (approval no. 351/20).  
14  
15  
16  
17  
18  
19  
20  
21  
22  
23  
24  
25  
26  
27  
28  
29  
30  
31  
32  
33  
34  
35  
36  
37  
38  
39  
40  
41  
42  
43  
44  
45  
46  
47  
48  
49  
50  
51  
52  
53  
54  
55  
56  
57  
58  
59  
60

For peer review only

## References

1. Siegel RL, Miller KD, Jemal A. Cancer statistics, 2019. *CA Cancer J Clin*. 2019 Jan 8;69(1):7–34.
2. Mustafa SS, Shah D, Bress J, Jamshed S. Response to PCV13 vaccination in patients with multiple myeloma versus healthy controls. *Hum Vaccin Immunother*. 2019;15(2):452–454.
3. Williams MD, Braun LA, Cooper LM, Johnston J, Weiss RV, Qualy RL, et al. Hospitalized cancer patients with severe sepsis: analysis of incidence, mortality, and associated costs of care. *Crit Care*. 2004 Oct;8(5):R291–8.
4. Griffiths H, Lea J, Bunch C, Lee M, Chapel H. Predictors of infection in chronic lymphocytic leukaemia (CLL). *Clin Exp Immunol*. 1992 Sep;89(3):374–377.
5. Perkins JG, Flynn JM, Howard RS, Byrd JC. Frequency and type of serious infections in fludarabine-refractory B-cell chronic lymphocytic leukemia and small lymphocytic lymphoma: implications for clinical trials in this patient population. *Cancer*. 2002 Apr 1;94(7):2033–2039.
6. Thigpen MC, Whitney CG, Messonnier NE, Zell ER, Lynfield R, Hadler JL, et al. Bacterial meningitis in the United States, 1998–2007. *N Engl J Med*. 2011 May 26;364(21):2016–2025.
7. Klemets P, Lyytikäinen O, Ruutu P, Ollgren J, Nuorti JP. Invasive pneumococcal infections among persons with and without underlying medical conditions: implications for prevention strategies. *BMC Infect Dis*. 2008 Jul 22;8:96.
8. Wong A, Marrie TJ, Garg S, Kellner JD, Tyrrell GJ, SPAT Group. Increased risk of invasive pneumococcal disease in haematological and solid-organ malignancies. *Epidemiol Infect*. 2010 Dec;138(12):1804–1810.
9. McLaughlin JM, Jiang Q, Isturiz RE, Sings HL, Swerdlow DL, Gessner BD, et al. Effectiveness of 13-Valent Pneumococcal Conjugate Vaccine Against Hospitalization for Community-Acquired Pneumonia in Older US Adults: A Test-Negative Design. *Clin Infect Dis*. 2018 Oct 30;67(10):1498–1506.
10. Robertson JD, Nagesh K, Jowitt SN, Dougal M, Anderson H, Mutton K, et al. Immunogenicity of vaccination against influenza, *Streptococcus pneumoniae* and *Haemophilus influenzae* type B in patients with multiple myeloma. *Br J Cancer*. 2000 Apr;82(7):1261–1265.
11. Levine AM, Overturf GD, Field RF, Holdorf D, Paganini-Hill A, Feinstein DI. Use and efficacy of pneumococcal vaccine in patients with Hodgkin disease. *Blood*. 1979 Nov;54(5):1171–1175.
12. Tsigrelis C, Ljungman P. Vaccinations in patients with hematological malignancies. *Blood Rev*. 2016 Mar;30(2):139–147.
13. Tsang V. Vaccination recommendations for the hematology and oncology and post-stem cell transplant populations. *J Adv Pract Oncol*. 2012 Mar;3(2):71–83.
14. Pasiarski M, Rolinski J, Grywalska E, Stelmach-Goldys A, Korona-Glowniak I, Gozdz S, et al. Antibody and plasmablast response to 13-valent pneumococcal conjugate vaccine in

- 1 chronic lymphocytic leukemia patients--preliminary report. PLoS One. 2014 Dec  
2 15;9(12):e114966.  
3  
4  
5 15. Ariza-Heredia EJ, Chemaly RF. Practical review of immunizations in adult patients with  
6 cancer. Hum Vaccin Immunother. 2015 Jun 25;11(11):2606–2614.  
7  
8 16. Oken MM, Creech RH, Tormey DC, Horton J, Davis TE, McFadden ET, et al. Toxicity and  
9 response criteria of the Eastern Cooperative Oncology Group. Am J Clin Oncol. 1982  
10 Dec;5(6):649–655.  
11  
12 17. Baden LR, Swaminathan S, Angarone M, Blouin G, Camins BC, Casper C, et al.  
13 Prevention and Treatment of Cancer-Related Infections, Version 2.2016, NCCN Clinical  
14 Practice Guidelines in Oncology. J Natl Compr Canc Netw. 2016;14(7):882–913.  
15  
16 18. Rubin LG, Levin MJ, Ljungman P, Davies EG, Avery R, Tomblyn M, et al. 2013 IDSA  
17 clinical practice guideline for vaccination of the immunocompromised host. Clin Infect  
18 Dis. 2014 Feb;58(3):e44–100.  
19  
20 19. Israel Ministry of Health - Vaccination Guide [Internet]. 2014 [cited 2020 Jun 4]. Available  
21 from: [https://www.health.gov.il/Subjects/vaccines/Pages/tadrich\\_Chisunim.aspx](https://www.health.gov.il/Subjects/vaccines/Pages/tadrich_Chisunim.aspx)  
22  
23 20. Bonten MJM, Huijts SM, Bolkenbaas M, CAPITA Coauthors. Vaccine against  
24 Pneumococcal Pneumonia in Adults. N Engl J Med. 2015 Jul 2;373(1):93.  
25  
26 21. Wong JL, Evans SE. Bacterial Pneumonia in Patients with Cancer: Novel Risk Factors and  
27 Management. Clin Chest Med. 2017 Jun;38(2):263–277.  
28  
29  
30  
31  
32  
33  
34  
35  
36  
37  
38  
39  
40  
41  
42  
43  
44  
45  
46  
47  
48  
49  
50  
51  
52  
53  
54  
55  
56  
57  
58  
59  
60

**Table 1:** Demographic and clinical characteristics of vaccinated and non-vaccinated patients

| Variable                       | Non-Vaccinated<br>(n=418, 67%)<br>N (%) | Vaccinated<br>(n=198, 33%)<br>N (%) | P value |
|--------------------------------|-----------------------------------------|-------------------------------------|---------|
| <b>Gender</b>                  |                                         |                                     | 0.219   |
| Male                           | 229 (54.8%)                             | 98 (49.5%)                          |         |
| Female                         | 189 (45.2%)                             | 100 (50.5%)                         |         |
| <b>Country of Birth</b>        |                                         |                                     | 0.079   |
| Israel                         | 209 (50%)                               | 114(57.6%)                          |         |
| Not Israel                     | 209 (50%)                               | 84(42.4%)                           |         |
| <b>Living area</b>             |                                         |                                     | 0.621   |
| City                           | 318(76.1%)                              | 147(74.2%)                          |         |
| Rural                          | 100(23.9%)                              | 51(25.8%)                           |         |
| <b>Family status</b>           |                                         |                                     | 0.773   |
| Married                        | 319(76.3%)                              | 149(75.3%)                          |         |
| Not married                    | 99(23.7%)                               | 49(24.7%)                           |         |
| <b>Splenectomy</b>             |                                         |                                     | 0.309   |
| Yes                            | 6(1.4%)                                 | 1(0.5%)                             |         |
| No                             | 412(98.6%)                              | 197(99.5%)                          |         |
| <b>Hematological diagnosis</b> |                                         |                                     | 0.043   |
| Lymphoid Malignancy            | 318(76.1%)                              | 160(80.8%)                          |         |
| Myeloid Malignancy             | 32(7.7%)                                | 5(2.5%)                             |         |
| Multiple Myeloma               | 68(16.3%)                               | 33(16.7%)                           |         |
| <b>Age at treatment</b>        |                                         |                                     | 0.372   |
| 19-65                          | 154(36.8%)                              | 82(41.4%)                           |         |
| 66-75                          | 137(32.8%)                              | 66(33.3%)                           |         |
| 76+                            | 127(30.4%)                              | 50(25.3%)                           |         |
| <b>ECOG performance score</b>  |                                         |                                     | 0.001   |
| Dependent                      | 37(8.9%)                                | 4(2%)                               |         |
| Not Dependent                  | 381(91.1%)                              | 194(98%)                            |         |
| <b>Treatment type</b>          |                                         |                                     | 0.035   |
| Chemotherapy                   | 131(31.3%)                              | 49(24.7%)                           |         |
| Biological                     | 19(4.5%)                                | 18(9.1%)                            |         |
| Combined treatment             | 268(64.1%)                              | 131(66.2%)                          |         |
| <b>Risk Neutropenic fever</b>  |                                         |                                     | 0.098   |
| High risk                      | 65(15.6%)                               | 28(14.1%)                           |         |
| Moderate risk                  | 335(80.1%)                              | 153(77.3%)                          |         |
| Low risk                       | 18(4.3%)                                | 17(8.6%)                            |         |

ECOG – Eastern Cooperative Oncology Group performance status

**Table 2:** Association between demographic and clinical characteristic and hospitalization rates due to pneumonia or sepsis within 12 months

|                                | No Admission<br>within 12<br>months | Admission within<br>12 months | P-value |
|--------------------------------|-------------------------------------|-------------------------------|---------|
|                                | N (%)                               | N (%)                         |         |
| <b>Vaccination status</b>      |                                     |                               | 0.005   |
| Vaccinated                     | 184(43.1%)                          | 14(18.2%)                     |         |
| Non-vaccinated                 | 335(65.9%)                          | 63(81.8%)                     |         |
| <b>Gender</b>                  |                                     |                               | 0.446   |
| Male                           | 283(52.5%)                          | 44(57.1%)                     |         |
| Female                         | 256(47.5%)                          | 33(42.9%)                     |         |
| <b>Hematological diagnosis</b> |                                     |                               | 0.010   |
| Lymphoid Malignancy            | 428(79.4%)                          | 50(64.9%)                     |         |
| Myeloid Malignancy             | 28(5.2%)                            | 9(11.7%)                      |         |
| Multiple Myeloma               | 83(15.4%)                           | 18(23.4%)                     |         |
| <b>Country of Birth</b>        |                                     |                               | 0.410   |
| Israel                         | 286(53.1%)                          | 37(48.1%)                     |         |
| No Israel                      | 253(46.9%)                          | 40(51.9%)                     |         |
| <b>Family status</b>           |                                     |                               | 0.476   |
| Not married                    | 132(24.5%)                          | 16(20.8%)                     |         |
| Married                        | 407(75.5%)                          | 61(79.2%)                     |         |
| <b>Living area</b>             |                                     |                               | 0.972   |
| City                           | 407(75.5%)                          | 58(75.3%)                     |         |
| Rural                          | 132(24.5%)                          | 19(24.7%)                     |         |
| <b>ECOG performance score</b>  |                                     |                               | 0.359   |
| Dependent                      | 34(6.3%)                            | 7(9.1%)                       |         |
| Not Dependent                  | 505(93.7%)                          | 70(90.9%)                     |         |
| <b>Risk Neutropenic fever</b>  |                                     |                               | 0.975   |
| High risk                      | 81(15%)                             | 12(15.6%)                     |         |
| Moderate risk                  | 427(79.2%)                          | 61(79.2%)                     |         |
| Low risk                       | 31(5.8%)                            | 4(5.2%)                       |         |
| <b>Splenectomy</b>             |                                     |                               | 0.886   |
| No                             | 533(98.9%)                          | 76(98.7%)                     |         |
| Yes                            | 6(1.1%)                             | 1(1.3%)                       |         |
| <b>Treatment type</b>          |                                     |                               | 0.635   |
| Biological treatment           | 33(6.1%)                            | 4(5.2%)                       |         |
| Chemotherapy treatment         | 154(28.6%)                          | 26(33.8%)                     |         |
| Combination treatment          | 352(65.3%)                          | 47(61%)                       |         |
| <b>Age at treatment</b>        |                                     |                               | 0.014   |
| 19-65                          | 218(40.4%)                          | 18(23.4%)                     |         |
| 66-75                          | 173(32.1%)                          | 30(39%)                       |         |
| 76+                            | 148(27.5%)                          | 29(37.7%)                     |         |

\*ECOG – Eastern Cooperative Oncology Group performance status

**Table 3:** Logistic regression analysis of factors associated with 12 month hospitalization due to pneumonia or sepsis

| Variable                              | OR    | 95% CI<br>(Lower | Upper) | P-value |
|---------------------------------------|-------|------------------|--------|---------|
| <b>Non-Vaccinated<br/>(reference)</b> |       |                  |        |         |
| <b>Vaccinated</b>                     | 0.454 | 0.246            | 0.839  | 0.012   |
| <b>Age at treatment</b>               |       |                  |        |         |
| 19-65 (reference)                     |       |                  |        |         |
| 66-75                                 | 1.915 | 1.022            | 3.588  | 0.043   |
| 76+                                   | 2.082 | 1.102            | 3.934  | 0.024   |
| <b>Hematological diagnosis</b>        |       |                  |        |         |
| Lymphoid Malignancy<br>(reference)    |       |                  |        |         |
| Multiple Myeloma                      | 1.704 | 0.936            | 3.101  | 0.081   |
| Myeloid Malignancy                    | 2.092 | 0.919            | 4.762  | 0.079   |

## STROBE Statement—checklist of items that should be included in reports of observational studies

|                              | Item No | Recommendation                                                                                                                                                                                                                                                                                                                                                                                                                                                                                                                                                                                                                                                                                                                             |
|------------------------------|---------|--------------------------------------------------------------------------------------------------------------------------------------------------------------------------------------------------------------------------------------------------------------------------------------------------------------------------------------------------------------------------------------------------------------------------------------------------------------------------------------------------------------------------------------------------------------------------------------------------------------------------------------------------------------------------------------------------------------------------------------------|
| <b>Title and abstract</b>    | 1       | (a) Indicate the study's design with a commonly used term in the title or the abstract (page1)<br>(b) Provide in the abstract an informative and balanced summary of what was done and what was found (page2)                                                                                                                                                                                                                                                                                                                                                                                                                                                                                                                              |
| <b>Introduction</b>          |         |                                                                                                                                                                                                                                                                                                                                                                                                                                                                                                                                                                                                                                                                                                                                            |
| Background/rationale         | 2       | Explain the scientific background and rationale for the investigation being reported (page6)                                                                                                                                                                                                                                                                                                                                                                                                                                                                                                                                                                                                                                               |
| Objectives                   | 3       | State specific objectives, including any prespecified hypotheses (page6)                                                                                                                                                                                                                                                                                                                                                                                                                                                                                                                                                                                                                                                                   |
| <b>Methods</b>               |         |                                                                                                                                                                                                                                                                                                                                                                                                                                                                                                                                                                                                                                                                                                                                            |
| Study design                 | 4       | Present key elements of study design early in the paper(page7)                                                                                                                                                                                                                                                                                                                                                                                                                                                                                                                                                                                                                                                                             |
| Setting                      | 5       | Describe the setting, locations, and relevant dates, including periods of recruitment, exposure, follow-up, and data collection (page 7)                                                                                                                                                                                                                                                                                                                                                                                                                                                                                                                                                                                                   |
| Participants                 | 6       | (a) <i>Cohort study</i> —Give the eligibility criteria, and the sources and methods of selection of participants. Describe methods of follow-up (page 7)<br><i>Case-control study</i> —Give the eligibility criteria, and the sources and methods of case ascertainment and control selection. Give the rationale for the choice of cases and controls (page7)<br><i>Cross-sectional study</i> —Give the eligibility criteria, and the sources and methods of selection of participants (page7)<br>(b) <i>Cohort study</i> —For matched studies, give matching criteria and number of exposed and unexposed (page7).<br><i>Case-control study</i> —For matched studies, give matching criteria and the number of controls per case (page7) |
| Variables                    | 7       | Clearly define all outcomes, exposures, predictors, potential confounders, and effect modifiers. Give diagnostic criteria, if applicable -not applicable                                                                                                                                                                                                                                                                                                                                                                                                                                                                                                                                                                                   |
| Data sources/<br>measurement | 8*      | For each variable of interest, give sources of data and details of methods of assessment (measurement). Describe comparability of assessment methods if there is more than one group (page8)                                                                                                                                                                                                                                                                                                                                                                                                                                                                                                                                               |
| Bias                         | 9       | Describe any efforts to address potential sources of bias- not applicable                                                                                                                                                                                                                                                                                                                                                                                                                                                                                                                                                                                                                                                                  |
| Study size                   | 10      | Explain how the study size was arrived at (page7)                                                                                                                                                                                                                                                                                                                                                                                                                                                                                                                                                                                                                                                                                          |
| Quantitative variables       | 11      | Explain how quantitative variables were handled in the analyses. If applicable, describe which groupings were chosen and why (page7)                                                                                                                                                                                                                                                                                                                                                                                                                                                                                                                                                                                                       |
| (p)Statistical methods       | 12      | (a) Describe all statistical methods, including those used to control for confounding page( 7-8)<br>(b) Describe any methods used to examine subgroups and interactions (page7-8)<br>(c) Explain how missing data were addressed(page8)<br>(d) <i>Cohort study</i> —If applicable, explain how loss to follow-up was addressed (page8)<br><i>Case-control study</i> —If applicable, explain how matching of cases and controls was addressed (page8)<br><i>Cross-sectional study</i> —If applicable, describe analytical methods taking account of sampling strategy (page8)<br>(e) Describe any sensitivity analyses (page8)                                                                                                              |



1  
2  
3  
4  
5  
6  
7  
8  
9  
10  
11  
12  
13  
14  
15  
16  
17  
18  
19  
20  
21  
22  
23  
24  
25  
26  
27  
28  
29  
30  
31  
32  
33  
34  
35  
36  
37  
38  
39  
40  
41  
42  
43  
44  
45  
46  
47  
48  
49  
50  
51  
52  
53  
54  
55  
56  
57  
58  
59  
60

Continued on next page

For peer review only

| <b>Results</b>           |     |                                                                                                                                                                                                                                                                                                                                                                                                                                                              |
|--------------------------|-----|--------------------------------------------------------------------------------------------------------------------------------------------------------------------------------------------------------------------------------------------------------------------------------------------------------------------------------------------------------------------------------------------------------------------------------------------------------------|
| Participants             | 13* | (a) Report numbers of individuals at each stage of study—eg numbers potentially eligible, examined for eligibility, confirmed eligible, included in the study, completing follow-up, and analysed (page7)<br>(b) Give reasons for non-participation at each stage (page7)<br>(c) Consider use of a flow diagram (not applicable)                                                                                                                             |
| Descriptive data         | 14* | (a) Give characteristics of study participants (eg demographic, clinical, social) and information on exposures and potential confounders (page7)<br>(b) Indicate number of participants with missing data for each variable of interest (page 7-8)<br>(c) <i>Cohort study</i> —Summarise follow-up time (eg, average and total amount) (page 8)                                                                                                              |
| Outcome data             | 15* | <i>Cohort study</i> —Report numbers of outcome events or summary measures over time (page9)<br><i>Case-control study</i> —Report numbers in each exposure category, or summary measures of exposure (page 9)<br><i>Cross-sectional study</i> —Report numbers of outcome events or summary measures (page 9-10)                                                                                                                                               |
| Main results             | 16  | (a) Give unadjusted estimates and, if applicable, confounder-adjusted estimates and their precision (eg, 95% confidence interval). Make clear which confounders were adjusted for and why they were included (page 9-10)<br>(b) Report category boundaries when continuous variables were categorized (not applicable)<br>(c) If relevant, consider translating estimates of relative risk into absolute risk for a meaningful time period ( not applicable) |
| Other analyses           | 17  | Report other analyses done—eg analyses of subgroups and interactions, and sensitivity analyses (not applicable)                                                                                                                                                                                                                                                                                                                                              |
| <b>Discussion</b>        |     |                                                                                                                                                                                                                                                                                                                                                                                                                                                              |
| Key results              | 18  | Summarise key results with reference to study objectives (page10)                                                                                                                                                                                                                                                                                                                                                                                            |
| Limitations              | 19  | Discuss limitations of the study, taking into account sources of potential bias or imprecision. Discuss both direction and magnitude of any potential bias (page 11-12)                                                                                                                                                                                                                                                                                      |
| Interpretation           | 20  | Give a cautious overall interpretation of results considering objectives, limitations, multiplicity of analyses, results from similar studies, and other relevant evidence (page 11-12)                                                                                                                                                                                                                                                                      |
| Generalisability         | 21  | Discuss the generalisability (external validity) of the study results (page12)                                                                                                                                                                                                                                                                                                                                                                               |
| <b>Other information</b> |     |                                                                                                                                                                                                                                                                                                                                                                                                                                                              |
| Funding                  | 22  | Give the source of funding and the role of the funders for the present study and, if applicable, for the original study on which the present article is based (page13)                                                                                                                                                                                                                                                                                       |

\*Give information separately for cases and controls in case-control studies and, if applicable, for exposed and unexposed groups in cohort and cross-sectional studies.

**Note:** An Explanation and Elaboration article discusses each checklist item and gives methodological background and published examples of transparent reporting. The STROBE checklist is best used in conjunction with this article (freely available on the Web sites of PLoS Medicine at <http://www.plosmedicine.org/>, Annals of Internal Medicine at <http://www.annals.org/>, and Epidemiology at <http://www.epidem.com/>). Information on the STROBE Initiative is available at [www.strobe-statement.org](http://www.strobe-statement.org).
